# Supplementary material
Source: PubMed Central journal article supplement (PMC2774931)

# TOC Graph

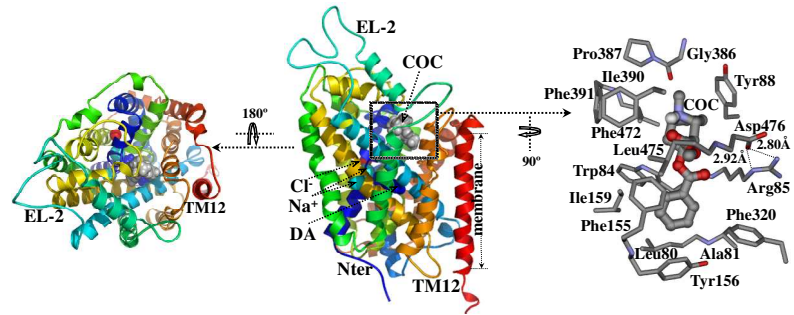

Supplement: NIHMS153043-supplement-2_si_002.pdf [file NIHMS153043-supplement-2_si_002.pdf]
